# Supplementary material
Source: MDPI journal article supplement (https://www.mdpi.com/2673-9879/4/1/10)
Supplement: s1 [file s1]

# Human Serum Albumin based Conjugates with Levofloxacin: Synthesis, Properties and Antibacterial Activity

Tatiana Yu Kopnova, Linara R. Yakupova, Natalya Georgievna Belogurova and Elena Vadimovna Kudryashova

## Supplementary

**Table S1.** Temperature dependence of the Stern-Volmer quenching constants for the LV-HSA's systems.

|                    | Temperature, K | $K_{SV}, M^{-1}$              | $k_q$                            |
|--------------------|----------------|-------------------------------|----------------------------------|
| HSA+LV [30]        | 298            | $(7.5 \pm 0.6) \times 10^4$   | $(13 \pm 1) \times 10^{12}$      |
|                    | 302            | $(5.8 \pm 0.4) \times 10^4$   | $(10.5 \pm 0.7) \times 10^{12}$  |
|                    | 306            | $(4.9 \pm 0.2) \times 10^4$   | $(8.6 \pm 0.4) \times 10^{12}$   |
|                    | 310            | $(3.4 \pm 0.2) \times 10^4$   | $(5.9 \pm 0.3) \times 10^{12}$   |
| HSA+(LV+HPCD) [30] | 298            | $(5.8 \pm 0.5) \times 10^4$   | $(10.1 \pm 0.9) \times 10^{12}$  |
|                    | 302            | $(4.9 \pm 0.4) \times 10^4$   | $(8.6 \pm 0.8) \times 10^{12}$   |
|                    | 306            | $(4.5 \pm 0.2) \times 10^4$   | $(8.0 \pm 0.4) \times 10^{12}$   |
|                    | 310            | $(3.2 \pm 0.1) \times 10^4$   | $(5.6 \pm 0.2) \times 10^{12}$   |
| HSA+(LV+HPolS)     | 310            | $(1.1 \pm 0.3) \times 10^5$   | $(19 \pm 0.2) \times 10^{12}$    |
| (HSA+HPCD)conj+LV  | 298            | $(3.5 \pm 0.3) \times 10^4$   | $(6.2 \pm 0.9) \times 10^{12}$   |
|                    | 302            | $(3.0 \pm 0.2) \times 10^4$   | $(5.2 \pm 0.3) \times 10^{12}$   |
|                    | 306            | $(2.6 \pm 0.1) \times 10^4$   | $(4.6 \pm 0.2) \times 10^{12}$   |
|                    | 310            | $(2.4 \pm 0.1) \times 10^4$   | $(4.3 \pm 0.2) \times 10^{12}$   |
| (HSA+HPolS)conj+LV | 298            | $(3.5 \pm 0.1) \times 10^4$   | $(6.04 \pm 0.08) \times 10^{12}$ |
|                    | 302            | $(2.92 \pm 0.04) \times 10^4$ | $(5.11 \pm 0.05) \times 10^{12}$ |
|                    | 306            | $(2.72 \pm 0.07) \times 10^4$ | $(4.76 \pm 0.09) \times 10^{12}$ |
|                    | 310            | $(2.5 \pm 0.1) \times 10^4$   | $(4.44 \pm 0.1) \times 10^{12}$  |

**Table S2.** Energy transfer parameters for the interactions of the drugs with human serum albumin (25 °C, PBS, pH 7.4).

| Parameter                      | HSA+LV | HSA+(LV+HPCD) |
|--------------------------------|--------|---------------|
| $J \times 10^{16}, M^{-1}cm^3$ | 2.82   | 3.35          |
| $R_0, nm$                      | 1.36   | 1.40          |
| $r, nm$                        | 1.63   | 1.82          |
| $E_{FRET}$                     | 0.2    | 0.16          |
